# Supplementary material for: Inhibitory Effects of Shikonin Dispersion, an Extract of Lithospermum erythrorhizon Encapsulated in β-1,3-1,6 Glucan, on Streptococcus mutans and Non-Mutans Streptococci
Source: MDPI journal article supplement (doi:10.3390/ijms25021075), 2024-01-16
Supplement: s1 [file s1]

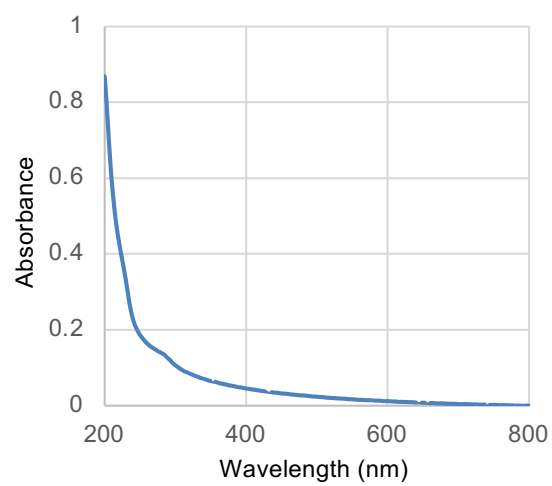

**Figure S1.** Absorption spectra of  $\beta$ -1,3,6 glucan solution.

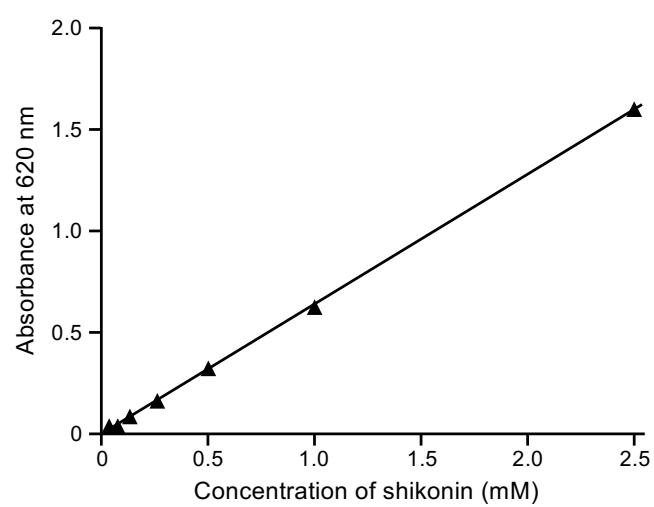

**Figure S2.** Calibration curve of shikonin dispersion in 1.0 M aqueous NaOH solution ( $n = 3$ , six technical replicates for each) .

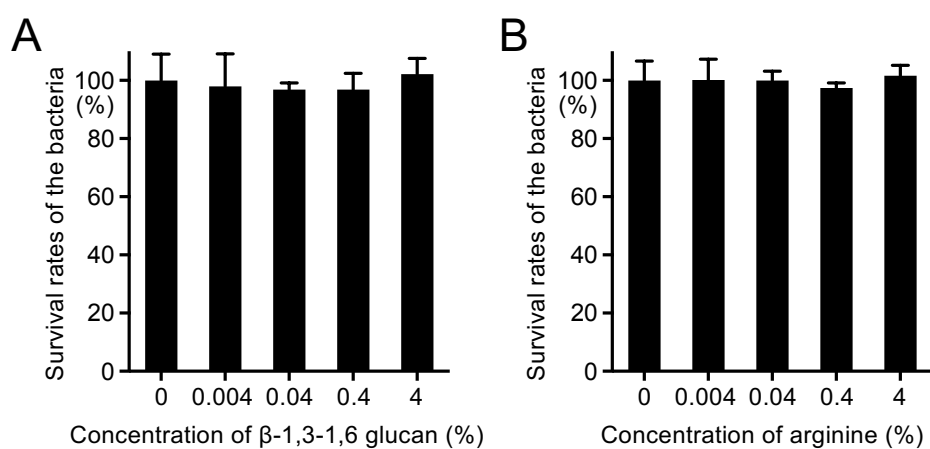

**Figure S3.** Effects of  $\beta$ -1,3-1,6 glucan and arginine solution on survival of *S. mutans* MT8148 suspended in phosphate-buffered saline (PBS). Inhibitory effect of  $\beta$ -1,3-1,6 glucan (A) and arginine (B) solution after 12 h on the survival of *S. mutans* MT8148. The concentration of  $\beta$ -1,3-1,6 glucan and arginine was calculated as 100% of the shikonin dispersion stock solution amount. Since 200  $\mu$ M of shikonin corresponds to 4% of shikonin dispersion, the concentrations of shikonin (Figure 2) and  $\beta$ -1,3-1,6 glucan and arginine are equal in "w/v".

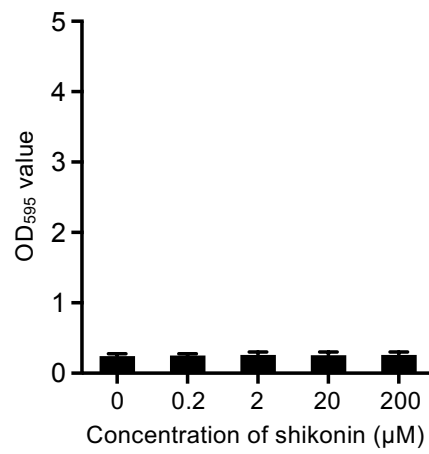

**Figure S4.** Effects of shikonin dispersion on biofilm formation by *S. mutans* MT8148 cultured in BHI broth without 1% sucrose.

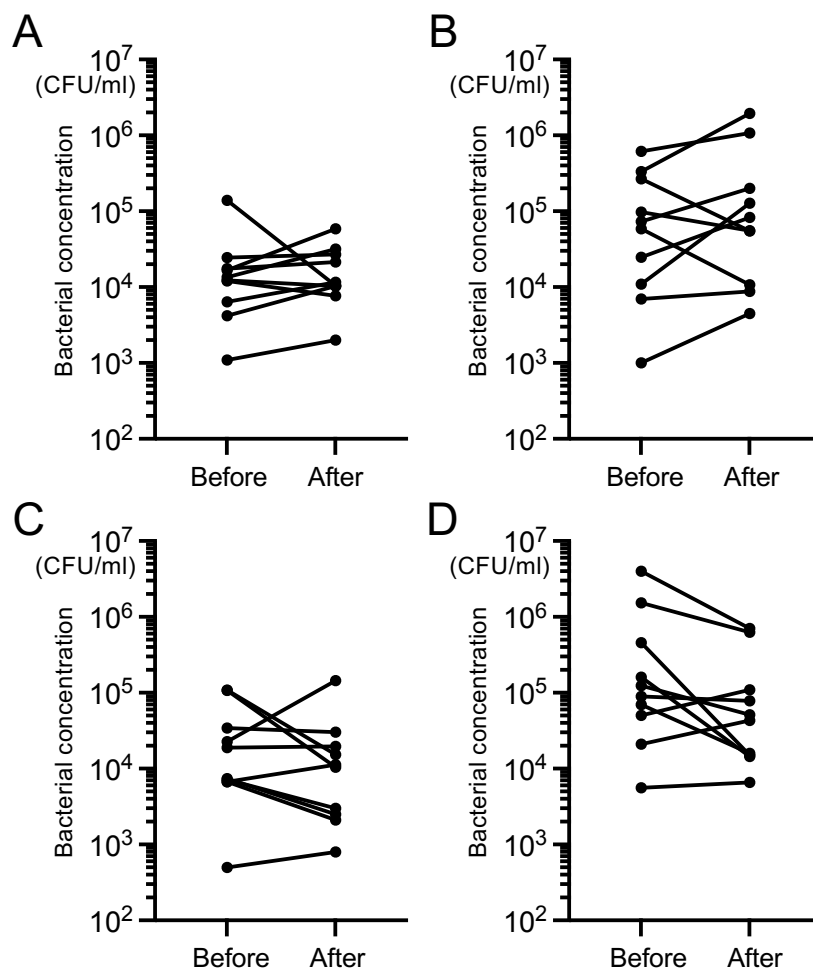

**Figure S5.** Changes in the number of *S. mutans* in saliva before and after using toothpaste with and without shikonin dispersion. The number of *S. mutans* (in CFU/ml) before and after brushing with toothpaste with no shikonin dispersion for 1 week in Group 1 (A) and Group 2 (B) and before and after brushing with toothpaste containing shikonin dispersion for 1 week in Group 1 (C) and Group 2 (D).
